1 **Title:** Bulk and spatially resolved extracellular metabolomics of free-living nitrogen fixation

2

3 **Author names and affiliations:**

4 Darian N Smercina <sup>a</sup>, Young-Mo Kim <sup>a</sup>, Mary S Lipton <sup>b</sup>, Dusan Velickovic <sup>b</sup>, Kirsten S

5 Hofmockel <sup>a, c</sup>

6

7 <sup>a</sup> Biological Sciences Division, Earth and Biological Sciences Directorate, Pacific Northwest

8 National Laboratory, Richland, WA, USA

9 <sup>b</sup> Environmental Molecular Sciences Laboratory, Pacific Northwest National Laboratory,

10 Richland, WA 99354, USA

11 <sup>c</sup> Department of Agronomy, Iowa State University, Ames, IA 50010

12

13 **Corresponding author:** Darian Smercina, Battelle for the US DOE, 3335 Innovation Blvd.,

14 Richland, WA 99354, (509) 375-2950, [darian.smercina@pnnl.gov](mailto:darian.smercina@pnnl.gov)

15

16 **ORCID IDs:**

17 Darian Smercina: 0000-0002-8484-3827

18 Young-Mo Kim: 0000-0002-8972-7593

19 Mary Lipton: 0000-0001-7749-0077

20 Dusan Velickovic: 0000-0001-7945-9620

21 Kirsten Hofmockel: 0000-0003-1586-2167

22

23 **Keywords:** Soil microbial ecology, multi-scale, spatially resolved, nitrogen fixation, microbial  
24 metabolomics, GC-MS, MALDI MSI

25

26 **Competing interests:** The authors declare no conflicts of interest.

27

28 **Funding:** D.N.S. is also grateful for the support of the Linus Pauling Distinguished Postdoctoral  
29 Fellowship program through Pacific Northwest National Laboratory. Pacific Northwest National  
30 Laboratory is a multiprogram national laboratory operated by Battelle for the U.S. Department of  
31 Energy under contract DE-AC05-76RL01830. This research was performed using resources at  
32 the Environmental Molecular Sciences Laboratory (EMSL; grid.436923.9), a DOE Office of  
33 Science User Facility sponsored by the Biological and Environmental Research program.

34

35

36

37

38

39

40

41

42

43

44

45

46 **Abstract**

47           Soil microorganisms drive ecosystem function, but challenges of scale between microbe  
48 and ecosystem hinder our ability to accurately quantify and predictively model the soil microbe-  
49 ecosystem function relationship. Quantifying this relationship necessitates studies that  
50 systematically characterize multi-omics of soil microorganisms and their activity across  
51 sampling scales from spatially resolved to bulk measures, and structural complexity, from liquid  
52 pure culture to *in situ*. To address this need, we cultured two diazotrophic bacteria in liquid and  
53 solid media, with and without nitrogen (N) to quantify differences in extracellular metabolites  
54 associated with nitrogen fixation under increasing environmental structural complexity. We also  
55 quantified extracellular metabolites across sampling scales including bulk sampling via GC-MS  
56 analysis and spatially resolved analysis via MALDI mass spectrometry imaging. We found  
57 extracellular production of inorganic and organic N during free-living nitrogen fixation activity,  
58 highlighting a key mechanism of terrestrial N contributions from this process. Additionally, our  
59 results emphasize the need to consider the structural complexity of the environment and spatial  
60 scale when quantifying microbial activity. We found differences in metabolite profiles between  
61 culture conditions, supporting previous work indicating environmental structure influences  
62 microbial function, and across scales, underscoring the need to quantify microbial scale  
63 conditions to accurately interpret microbial function.

64

65 **Importance:** Studying soil microorganisms, both who is present and what they are doing, is a  
66 challenge because of vast differences in scale between microorganism and ecosystem and  
67 because of inherent complexities of the soil system (e.g., opacity, chemical complexity). This  
68 makes measuring and predicting important ecosystem processes driven by soil microorganisms,

69 like free-living nitrogen fixation, difficult. Free-living nitrogen fixing bacteria play a key role in  
70 terrestrial nitrogen contributions and may represent a significant, yet overlooked, nitrogen source  
71 in agricultural systems like bioenergy crops. However, we still know very little about how free-  
72 living nitrogen fixation contributes nitrogen to terrestrial systems. Our work provides key insight  
73 by hierarchically increasing structural complexity (liquid vs. solid culture) and scale (spatially  
74 resolved vs. bulk) to address the impact of environmental structure and sampling scale on  
75 detection of free-living nitrogen fixation and to identify the forms of nitrogen contributed to  
76 terrestrial systems by free-living nitrogen bacteria.

77

## 78 **Introduction**

79 Soil microorganisms are a key link between above and belowground ecosystem function,  
80 driving energy and nutrient transfer between the atmosphere, biosphere, and pedosphere (1-3).  
81 Multi-omic analysis aimed at understanding the structure and function of these microorganisms  
82 has become a routine tool for environmental samples. Despite generating large amounts of data,  
83 even quantitatively linking 'omics of a specific function (e.g. functional genes and proteins) to  
84 measures of that function is often unsuccessful (2-6) because of inherent challenges of studying  
85 soils (5-7) and soil microorganisms. Given these challenges, the importance of linking microbial  
86 community structure to function has been questioned (8, 9), however without clearer  
87 understanding of how microorganisms relate to observed functions we cannot yet rule out the  
88 importance of individual microbial community members. Our limited ability to quantitatively link  
89 soil microbial communities to ecosystem function hinders our understanding of ecosystem  
90 processes, leaving us vulnerable to losing vital ecosystem services provided by our soils,  
91 particularly in the face of climate change (10).

92 Quantifying the link between soil microorganisms and ecosystem function requires  
93 systematic studies that characterize multi-omics of soil microorganisms and their functions  
94 hierarchically across scales of space and complexity (Fig. 1; (4, 11). *In vitro* studies using pure  
95 cultures or limited species are an appealing option and have the potential to provide fundamental  
96 microbial and ecological knowledge (10, 12, 13). However, culturing conditions are often quite  
97 different from those experienced by microorganisms in soil and attachment to surfaces has been  
98 shown to impact microbial growth and function (14, 15). Thus, physical structure influences  
99 microbial function, and it is therefore essential for studies to systematically characterize multi-  
100 omics and function *in vitro* under growth conditions of increasing complexity (e.g.  
101 environmental structure) in order to determine how culture work may better inform *in situ*  
102 processes (Fig. 1).

103 In this study, we explored two questions surrounding the microbe-ecosystem function  
104 relationship: (1) Are there microbial metabolomic signatures associated with target ecosystem  
105 processes? (2) How do growth conditions and sampling scale influence metabolomic signatures?  
106 We used free-living nitrogen fixation (FLNF), biological nitrogen fixation (BNF) carried out by  
107 heterotrophic bacteria (diazotrophs), as a model microbial process and ecosystem function to  
108 address these questions. FLNF is carried out by a wide diversity of soil bacteria and occurs in all  
109 terrestrial biomes, contributing significantly to terrestrial N (16, 17). These contributions are  
110 thought to occur predominately through release of ammonium and organic N sources, like amino  
111 acids, as occurs during symbiotic BNF (18-21). Thus, extracellular metabolites may be valuable  
112 to understanding FLNF and identifying biosignatures.

113 We examined extracellular metabolites from two diazotrophic bacteria cultured under  
114 conditions that promote (N-free) or inhibit (N-rich) FLNF. Additionally, cultures were grown in

115 liquid or on solid media to examine the impact of physical structure on detected metabolites.  
116 Lastly, we examined extracellular metabolites across sampling scale from spatially resolved  
117 measures using matrix-assisted laser desorption/ionization mass spectrometry imaging (MALDI–  
118 MSI) to bulk sampling via gas chromatography–mass spectrometry (GC-MS) analysis. We  
119 hypothesized: (1) bulk metabolite profiles differ between N-rich and N-free conditions and also  
120 between liquid and solid cultures, (2) there are extracellular metabolites associated with FLNF  
121 activity and only observed under N-free conditions, (3) these extracellular metabolites are  
122 detectable with bulk and spatially resolved sampling, and (4) N-containing compounds are  
123 produced during FLNF and are readily detectable in bulk and spatially resolved extracellular  
124 metabolites under N-free conditions.

125

## 126 **Results**

### 127 *Microbial biomass – total biomass, biomass C, and biomass N*

128 Total microbial biomass, including cells and associated debris such as EPS, was collected  
129 from all treatments except for the AV N-rich solid treatment. In this case, microbial colonies had  
130 grown into and below the agar surface and it was not possible to collect biomass. Total biomass  
131 was highly variable across all treatments (CV across treatments ranged from 4.6% to 100.4%)  
132 and there were no significant differences observed with N treatment, culture type, or organism  
133 (Fig. 2D). Both biomass C and N differed significantly across treatments (Fig. 2A and 2B,  
134 respectively). In general, C and N content were greater in N-rich treatments where N was readily  
135 available compared to N-free treatments. There was also a trend towards greater biomass C and  
136 N from solid media, but this was mostly observed in the N-rich treatments. These C and N values  
137 translated to C:N ratios that predominately differed only between N treatments with the N-free

138 treatment resulting in greater biomass C:N ratios than N-rich conditions, regardless of culture  
139 type or organism (Fig. 2C).

140

#### 141 *Extracellular ammonium availability*

142 Extracellular ammonium availability was measured supernatant and rinsate samples and  
143 was detected in all treatments regardless of culture type, N treatment, or organism. On a per unit  
144 biomass basis, ammonium concentrations differed significantly by organism ( $F = 16.390$ ,  $p =$   
145  $0.0012$ ) and by the interaction between culture type and N treatment ( $F = 35.411$ ,  $p < 0.0001$ ).  
146 Extracellular ammonium availability per unit biomass was over 8x greater in PP than AV  
147 cultures (Fig. 3A). Under N-free conditions, ammonium availability was greater in liquid than in  
148 solid culture while in N-rich conditions the opposite was observed (Fig. 3B). Extracellular  
149 ammonium availability is of particular interest in N-free treatments as ammonium is  
150 hypothesized to be released from cells actively fixing N and thus represents a major form of N  
151 contributed by FLNF to terrestrial systems (18, 33). Therefore, we also calculated the percent of  
152 fixed N available as extracellular ammonium (Fig. 4). Total fixed N was estimated as total  
153 biomass N measured in N-free treatment samples. We find only upwards of 7.5% ( $\pm 2.3$ ) of fixed  
154 N is readily available as extracellular ammonium. This did not differ significantly between  
155 culture types ( $F = 2.171$ ,  $p = 0.184$ ), though ammonium concentrations in solid culture tended to  
156 be lower than those in liquid culture.

157

#### 158 *Bulk extracellular metabolites*

159 Across all treatments, 307 metabolites were detected with bulk sampling and of these 93  
160 were successfully annotated (>80% confidence). The total number of detected metabolites

161 differed between treatment groups (Supp. Fig. 2) with generally more metabolites detected in N-  
162 free treatments, the majority of which were within the unannotated portion of detected  
163 metabolites. Distinct metabolite profiles, represented by Bray-Curtis and Jaccard distance based  
164 on all detected metabolites, were observed between N treatment, culture type, and their  
165 interaction (Fig. 5; Table 1). N treatment and culture type, together with their interaction, explain  
166 over 50% of the variance in metabolite profiles based on peak intensity (Fig. 5A) and based on  
167 presence-absence (Fig. 5B). Metabolite profiles based on abundance separated predominantly by  
168 culture type and then by N treatment (Fig. 5A). Metabolite profiles based on presence-absence  
169 show clear separation between culture types for N-rich treatments but have little separation under  
170 N-free conditions (Fig. 5B).

171 Because FLNF activity is hypothesized to result in the release of N-containing  
172 metabolites (33), we focused on N-containing extracellular metabolites. Of the 93 annotated  
173 metabolites detected through bulk sampling, 35 were N-containing. We found significant  
174 differences in N-containing compounds across treatments, after correcting for background  
175 metabolites, with significant interactions between N treatment, culture type, and organism ( $F =$   
176  $10.695$ ,  $p = 0.0048$ ). N-free treatments were richer in N-containing metabolites (Supp. Fig. 3) but  
177 had similar or significantly lower total abundances of N-containing metabolites compared to N-  
178 rich treatments (Fig. 6). Examining the specific composition of these N-containing compounds,  
179 we found a variety of amino acids in N-free samples not well represented in N-rich samples  
180 (Supp. Fig. 3), but only a few N-containing metabolites were unique to N-free conditions  
181 including pantothenic acid, L-pyroglutamic acid, L-glutamic acid, and 4-pyridoxic acid.

182 *Spatially resolved extracellular metabolites*



183           Across all treatments, METASPACE analysis identified 69 metabolites in spatially  
184 resolved samples of which 41 were N-containing. However, only a few potential amino acids  
185 were detected at this resolved microbial scale including L-leucine and L-valine. These were only  
186 at detectable concentrations within the N-rich treatment (Fig. 7) unlike the diversity of amino  
187 acids detected in bulk samples predominately in association with N-free treatments.  
188 Observationally, N-free treatments seemed to be characterized by unique presence of organic  
189 acids rather than N-containing compounds. However, we did identify a few N-containing  
190 compounds unique to N-free treatments at the microbial scale including inosine and 4-pyridoxic  
191 acid (Fig. 7). Inosine was detected in N-free treatments of both AV and PP and was not at  
192 detectable levels in N-rich treatments. Also, much like bulk sampling scale detection, 4-  
193 pyridoxic acid was exclusively detected in AV N-free treatment samples.

194

## 195 **Discussion**

196           We explored the impact of N availability and physical structure on the extracellular  
197 metabolomics of diazotrophic bacteria across sampling scales from the spatially resolved to bulk.  
198 We find evidence of extracellular organic and inorganic N contributions from FLNF  
199 underscoring a key mechanism of terrestrial N contributions from FLNF. In general, we find  
200 physical structure and microbial function (e.g. FLNF) alter extracellular metabolite profiles and  
201 influence the detection of metabolites at bulk and spatially resolved scales.

202

### 203 *Nitrogen contributions from FLNF*

204           Products of BNF by symbiotic diazotrophs are well-studied and typically observed as  
205 ammonia and ammonium with contested evidence for production of amino acids (18-21). This

206 knowledge of symbiotic BNF is thought to translate directly to FLNF leading to the assumption  
207 that free-living diazotrophs also excrete ammonia/ammonium into the surrounding environment  
208 during BNF. However, ammonia produced during FLNF is rapidly assimilated through  
209 conversion to glutamine or glutamate via the glutamine synthetase (GS) and glutamate  
210 synthetase (GOGAT) pathways (34). Thus, excreted ammonium would necessarily be in excess  
211 of these assimilation pathways (34). Ammonium excretion has been observed in wild-type  
212 *Azotobacter vinelandii* DJ, at concentrations between ~2 and ~25  $\mu\text{M}$  (35, 36), values within  
213 range of those measured in this study (Supp. Fig. 4). However, in many cases measurable  
214 ammonium excretion was only observed from *Azotobacter vinelandii* cultures genetically altered  
215 to disrupt the GS-GOGAT pathways or facilitate constitutive nitrogenase synthesis (37-40).

216 An alternative hypothesis to ammonium excretion is that N contributions occur as organic  
217 N, either through direct release of N-rich compounds like amino acids (18, 21) or through  
218 turnover of dead biomass (41). Our bulk metabolomics data support this hypothesis with many  
219 N-containing organic compounds, including amino acids detected in N-free treatments. In fact,  
220 N-free treatments were richer in N-containing compounds than N-rich conditions, particularly  
221 when comparing against N-rich solid media which had few N-containing metabolites (Supp. Fig.  
222 3). The structure of our study did not allow us to determine whether these organic molecules  
223 were directly excreted by active, N-fixing cells or released during cell turnover. However, other  
224 metabolites detected in the system suggest cell turnover contributed at least partially to this N  
225 release. For example, we detected inosine in both bulk and spatially resolved analysis, and it was  
226 unique to N-free treatments in spatially resolved samples. Inosine, a metabolic product of  
227 adenine degradation likely indicates salvage activities by the bacterial populations (42, 43) and  
228 could indicate freely available nucleotides from cell lysis and turnover. FLNF may therefore

229 contribute available N through increasing microbial biomass and turnover, but this needs to be  
230 verified in future studies. Regardless of whether these N-containing compounds are actively  
231 excreted or released after cell death, this metabolic exchange with the surrounding environment  
232 highlights a key mechanisms of terrestrial N contributions from FLNF.

233

#### 234 *In vitro vs in situ analysis – identification of biosignatures*

235 Through bulk and spatially resolved analysis, we found few N-containing metabolites  
236 exclusive to N-free treatments. At bulk scale, these include pantothenic acid, L-pyroglutamic  
237 acid, L-glutamic acid, and 4-pyridoxic acid. We similarly find 4-pyridoxic acid at the spatially  
238 resolved microbial scale as well as nine other metabolites including inosine. 4-pyridoxic acid  
239 was unique to AV N-free treatments at the microbial scale. However, despite being uniquely  
240 associated with N-free treatments and therefore microbial populations actively fixing N, it may  
241 be difficult to assign these as a signature of FLNF function. Of these compounds, only L-  
242 glutamic acid has a direct association with the FLNF pathway. Other metabolites seem more  
243 indicative of microbial nutrient needs and function. For example, pantothenic acid, vitamin B<sub>5</sub>, is  
244 involved in the synthesis of coenzyme A and is a coenzyme for many reactions involved in  
245 protein and lipid metabolism (44-46). This is particularly important for the processing of organic  
246 acids like malate, the main C source provided in this study. Thus, the detection of vitamin B<sub>5</sub> is  
247 likely indicative of malate metabolism via the TCA cycle and its unique detection in the N-free  
248 treatment suggests a higher respiration rate in these N-fixing populations than in the N-rich  
249 populations. Increased respiration is a common response among diazotrophs in oxygenated  
250 environments as a protection mechanism to prevent or reduce denaturation of nitrogenase via  
251 oxygen (17, 47, 48). We also identified 4-pyridoxic acid, a derivative of pyridoxine (vitamin B<sub>6</sub>).

252 Pyridoxine is a key cofactor in amino acid, fatty acid, and carbohydrate metabolisms, but can  
253 also act an oxygen protectant (46). During this redox reaction, pyridoxine degrades and can  
254 result in 4-pyridoxic acid. *A. vinelandii* has been observed to produce B vitamins while under  
255 diazotrophic conditions and this seems to be a hallmark of FLNF for this organism (46, 49, 50).  
256 Though not directly associated with the N-fixation pathway, these vitamins may tangentially  
257 indicate bacteria functions surrounding FLNF such as oxygen regulation and highlight the need  
258 to analyze bacterial function holistically rather than focusing on single reactions or pathways.

259         Additionally, the limited number of unique extracellular metabolites detected in N-free  
260 treatments suggests some microbial functions may not have detectable or unique biosignatures,  
261 in the form of extracellular metabolites. This is an important consideration when applying  
262 metabolomics to the study of complex soil systems. Soil metabolomics are increasingly being  
263 used to study soil microbial ecology and biogeochemical function and have been successfully  
264 applied to soil carbon cycling (51-54). However, metabolites are by definition the by-products of  
265 and substrates for metabolic function, and turnover rapidly in soils (55, 56). Therefore, typical  
266 soil extractions to collect extracellular components (e.g. K<sub>2</sub>SO<sub>4</sub> extracts, leachate; (57, 58) only  
267 capture what is not consumed by the microbial community. This includes metabolites available  
268 in dissolved organic matter pools at the time of sampling and metabolites readily exchangeable  
269 from mineral surfaces (59). In both cases, metabolites could be temporally separated from their  
270 originating processes making it difficult to trace back the associated metabolic pathway. It could  
271 be even more challenging to capture metabolic biosignatures from nutrient-limited communities,  
272 such as those in bulk soil. Under nutrient-limited conditions, resulting metabolic products are  
273 likely to be rapidly assimilated or, in the case of processes like FLNF, not released to the  
274 surrounding environment. The potential signature compounds of FLNF found here (e.g. amino

275 acids and B-vitamins) are also not uniquely produced by FLNF processes and would be difficult  
276 to directly link to FLNF *in situ*. We acknowledge our study system may provide a biased view on  
277 this issue, being a closed incubation system unlike soils where metabolites may diffuse away  
278 from microbes and persist in the environment. However, these findings highlight a key need to  
279 understand the soil microhabitat (11).

280         Lastly, our work highlights the importance of considering culture conditions and their  
281 association to *in situ* conditions as we observed clear differences in metabolite profiles between  
282 liquid and solid culture. Interestingly, though culture type strongly influenced metabolite  
283 profiles, it played a secondary role to N treatment in influencing the number of detected  
284 metabolites. This was particularly notable when N was readily available, where presence-  
285 absence based profiles were distinct between liquid and solid culture, but only under N-rich  
286 conditions. These differences in metabolite profiles were likely not driven by differences in  
287 biomass production as culture type had small and non-significant impacts on microbial metrics,  
288 like total biomass, and biomass C and N content. Thus, these responses seem specifically  
289 associated with the presence or absence of physical structure in the environment. Additionally,  
290 these findings suggest nutrient limitation, as experienced in the N-free treatments, may be a  
291 stronger driver of microbial activity than physical structure and simplified liquid culture may be  
292 somewhat informative to nutrient-limited *in situ* conditions.

293

#### 294 *Implications scaling from microbial scale to bulk sampling*

295         The combination of techniques in this study allowed us to explore detection of  
296 metabolites across scales from spatially resolved, relevant to microorganisms, to bulk, relevant  
297 for soil microbial ecology analysis. MALDI MSI allowed us to resolve abundances of

298 extracellular metabolites on solid media at a microbial scale. Using GC-MS, we were able to  
299 evaluate detection of extracellular metabolites at the bulk scale. While the detection ranges of  
300 these two techniques do not fully overlap (50 – 500 m/z for GC-MS and 92 – 700 m/z for  
301 MALDI), many metabolites of interest to this study are measurable with both techniques  
302 providing valuable information about metabolite detection and sampling scale. It is also  
303 important to note that a lack of detection is not equivalent to metabolite absence but only  
304 indicates metabolite concentrations were below detection.

305 Through bulk sampling, we found a wide variety of N-containing compounds in N-free  
306 samples, but generally lower abundances of N-containing compounds than in the N-rich  
307 treatment. While N-containing compounds are characteristic of N-free samples at a bulk scale,  
308 these treatments had fewer N-containing metabolites when spatially resolved at the microbial  
309 scale. Interestingly, there was a shift in amino acid detection between spatially resolved and bulk  
310 scales where amino acids were commonly detected in N-free samples at bulk scale, but in N-rich  
311 samples when spatially resolved. This somewhat counterintuitive result highlights differences in  
312 N competition at the microbial scale and its influence on bulk measurements.

313 First, detection of a diverse array of amino acids in the N-free treatment in bulk sample,  
314 but not in spatially resolved samples suggests N competition at the microbial scale resulted in  
315 rapid uptake of amino acids, while extraction of the bulk metabolite pool likely captured the  
316 cumulative low abundance signal of the entire system. Amino acids are shown to have short  
317 residence times in soils and experience rapid uptake and turnover (60, 61). In the case of  
318 microbial vs. bulk scale, it is likely the spatially resolved pool of extracellular amino acids  
319 collected from microbial colonies (~200  $\mu\text{m}$  spatial resolution) was small and often below  
320 detection. However, in bulk sampling of millions of cells, a larger pool of amino acids coupled to

321 our sampling method could have allowed amino acids to diffuse away and accumulate to  
322 detectable levels.

323         Second, biofilm formation is likely to influence diffusion of metabolites into the  
324 surrounding environment (62, 63). Bacteria tend to live in biofilms in their natural environments  
325 rather than as individually dispersed cells (64). However, the impact of surrounding  
326 environmental conditions, including nutrient availability, on biofilm production is unclear. For  
327 example, some studies suggest nutrient limiting conditions may promote greater biofilm  
328 formation (65), while others suggest biofilm formation is greater under more favorable growth  
329 conditions (66, 67). This is particularly notable for diazotrophs as biofilms can play a role in  
330 oxygen protection (47), thus investment in biofilm could be beneficial to FLNF activity. Yet,  
331 under severe N limitation imposed by an N-free environment the high energy demands of FLNF  
332 may limit investment in biofilm. While not directly measured in this study, we noted solid agar  
333 plates of *Azotobacter vinelandii* and *Paenibacillus polymyxa* cultures had visually greater  
334 biofilm production under N-rich than N-free conditions. Thus, diffusion of amino acids away  
335 from populations would have been more easily achieved in the N-free treatment. This is  
336 evidenced by the similarity between metabolite chemistry in liquid and solid culture under N-  
337 free treatments (Fig. 5B). Similarly, a small number of amino acids were detected in spatially  
338 resolved samples from N-rich treatments, but not in bulk samples for the similar N-rich solid  
339 media treatment. This could have resulted from greater biofilm formation under N-rich  
340 conditions and limited diffusion of small molecules away from cell populations.

341         The detection of small molecules across scales has important implications for the  
342 influence of soil microbial communities on their surrounding environment. In general, our results  
343 indicate microbial scale processes drive bulk metabolite availability. The N-rich treatment in this

344 experiment is an optimal environment and most representative of carbon and nutrient rich soil  
345 environments like the rhizosphere or detritosphere. Our findings suggest these conditions would  
346 result in production of valuable small molecules, like N-rich amino acids, potentially  
347 exchangeable with the immediate environment, but biofilm formation may limit diffusion far  
348 into the soil environment. Under limiting conditions of the N-free treatment, similar those of  
349 bulk soil, microbial activity produces valuable metabolites, like amino acids, but competition  
350 between microbes reduces the exchange of these molecules. Understanding how these  
351 differences in microbial scale conditions influence microbial activity and detectability of  
352 function is crucial to accurately linking microbe and ecosystem.

353

## 354 **Conclusions**

355 We demonstrate extracellular production of inorganic and organic N during FLNF and  
356 reveal the importance of habitat conditions and sampling scale when quantifying microbial  
357 activity. Across bulk and spatially resolved sampling scales, we identified metabolites uniquely  
358 associated with FLNF activity including several B-vitamins, which may play roles in mitigating  
359 oxygen damage to nitrogenase. Despite finding unique metabolites and potential biosignatures,  
360 many detected metabolites are not exclusively produced through FLNF related pathways, thus  
361 would be difficult to assign to FLNF for *in situ* soil samples. This would likely hold true for  
362 other processes under nutrient limited conditions where metabolic products are rapidly  
363 assimilated and not captured during sampling. Our findings highlight the need to carefully  
364 consider both structural complexity and sampling scale when quantifying microbial function. We  
365 found culture conditions to be a key driver of metabolite chemistry under N-rich and N-free  
366 conditions, indicating physical structure influences microbial processes. Across scales, our



367 results indicate high N competition at the microbial scale under N-free conditions, while at the  
368 bulk scale N appeared readily available within the microbial environment. These differences in  
369 environmental conditions across scales could lead to incorrect interpretations of microbial  
370 function as immediate conditions surrounding microorganisms will drive their activity and may  
371 not necessarily match what is measured through bulk or composite sampling.

372

## 373 **Materials and Methods**

### 374 *Culture conditions*

375 Two diazotrophic bacteria with distinct growth strategies (e.g. gram-negative vs gram-  
376 positive) and fully sequenced genomes (22, 23) were chosen for this study, *Azotobacter*  
377 *vinelandii* DJ (ATCC BAA 1303; hereafter AV) and *Paenibacillus polymyxa* (ATCC 842;  
378 hereafter PP). Bacteria were cultured under N-free and N-rich conditions, respectively promoting  
379 or inhibiting FLNF. Nfb media, commonly used to isolate diazotrophs (24), was used for N-free  
380 treatments, and was supplemented with tryptone for N-rich treatments. Both treatments  
381 contained 1.79 g C L<sup>-1</sup> as malic acid and N-rich media contained ~1.33 g N L<sup>-1</sup> as tryptone.  
382 Cultures were grown in liquid or solid agar media and all media was autoclave sterilized prior to  
383 inoculation.

384 Thirty samples were cultured (2 organisms x 2 N treatments x 2 media types x 3  
385 replicates, plus controls) for bulk analysis with an additional set of 14 samples (2 organisms x 2  
386 N treatments x 3 replicates, plus controls) on solid media for spatially resolved analysis. Cultures  
387 were grown in a temperature-controlled incubator at 25°C to 10<sup>7</sup> CFU mL<sup>-1</sup>, based on liquid  
388 cultures, and then harvested for analysis of extracellular metabolites at two scales – bulk  
389 sampling via MPLEx extraction and GC-MS (25) and spatially-resolved sampling via colony

390 analysis with MALDI MSI. Extracellular ammonium availability and microbial biomass,  
391 including total biomass, biomass carbon (C) and biomass N, were also measured. Because FLNF  
392 activity is necessary for microbial growth under N-free conditions, measures of total biomass and  
393 biomass N are used as estimates of FLNF (24).

#### 394 *Sample collection*

395 Extracellular metabolites were collected from liquid culture by centrifuging culture tubes  
396 to pellet cells and collecting the resulting supernatant for bulk analysis as described below. Cell  
397 pellets were resuspended in autoclave sterilized nanopure water, immediately flash frozen on  
398 liquid nitrogen, and stored at -80°C until further analysis. Extracellular metabolites were  
399 collected from solid media for bulk and spatially resolved analysis. Bulk samples were collected  
400 by washing culture plate surfaces with autoclave sterilized nanopure water and collecting the  
401 resulting rinsate. Samples were collected for spatially resolved analysis as described below.  
402 Lastly, microbial colonies from rinsate plates were collected from the surface by gentle scraping,  
403 transferred to autoclave sterilized nanopure water, flash frozen on liquid nitrogen, and stored at -  
404 80°C until further processing.

#### 405 *Microbial biomass – total biomass, biomass C, and biomass N*

406 Frozen cell pellets and colonies were lyophilized until completely dry and weighed to  
407 obtain total biomass, including cells and associated debris such as exopolysaccharides (EPS).  
408 Dried biomass was ground using sterile steel beads and then analyzed for C and N content on a  
409 VarioTOC Cube (Elementar, Langenselbold, Germany).

#### 410 *Extracellular ammonium availability*

411 We measured extracellular ammonium concentrations in supernatant and rinsate samples  
412 using a high-throughput colorimetric ammonium assay (26). Briefly, samples were pipetted in

413 triplicate into clear 96-well plates and incubated with ammonium salicylate and ammonium  
414 cyanurate reagents to facilitate color change via the Berthelot reaction. Plates were read for  
415 absorbance at 610 nm on a Synergy H1 plate reader (BioTek Instruments, Inc., Winooski, VT,  
416 USA).

#### 417 *Bulk metabolomics – GC-MS*

418 Bulk metabolomics analysis was conducted on 1 ml subsamples of undiluted, supernatant  
419 and rinsate samples. Supernatant and rinsate samples were prepared for metabolite analysis via  
420 GC-MS following the MPLEx protocol for simultaneous metabolite, protein, and lipid extraction  
421 (25). Additionally, 1 ml of supernatant and rinsate from sterile liquid culture and solid culture  
422 plates were also extracted via MPLEx as background controls. This extraction method allows  
423 simultaneously collection of metabolites, lipids, and proteins; however, lipid fractions were not  
424 analyzed in this study. Additionally, protein yields were too low for downstream analysis.  
425 Metabolite samples were completely dried under speed-vacuum concentrator and chemically  
426 derivatized prior to analysis by GC-MS as reported previously (27). The m/z range of derivatized  
427 metabolites scanned was 50 – 550 m/z which can detect organic acids, amino acids, and mono to  
428 tri-saccharides. Raw GC-MS data were processed using the PNNL in-house metabolomics  
429 database, which can identify metabolites using two dimensional matching factors (fragmented  
430 spectrum + retention index (28), and with cross-checking against commercially available NIST  
431 20/Wiley 11<sup>th</sup> GC-MS spectral databases (25, 29).

#### 432 *Spatially resolved metabolomics – MALDI MSI*

433 Samples were prepared for spatially resolved analysis via MALDI-MSI using a  
434 previously described workflow (30). Briefly, areas of agar were excised from Petri dishes and  
435 placed onto double-sided adhesive copper tape adhered to indium tin oxide (ITO)-coated glass

436 slides (Bruker Daltonics; Supp. Fig 1.). This approach enhanced our sensitivity for analysis in  
437 negative ionization mode and improved adhesion of agar onto the MALDI target. Samples were  
438 dried at room temperature overnight, then treated with MALDI matrix using a HTX TM-Sprayer  
439 (HTX Technologies). For analysis in negative-ion mode, 7 mg mL<sup>-1</sup> of N-(1-naphthyl)  
440 ethylenediamine dihydrochloride (NEDC) in 70% MeOH was sprayed with eight passes at 1,200  
441  $\mu$ L min<sup>-1</sup>, 75°C, a spray spacing of 3 mm, and a spray velocity of 1,200 mm min<sup>-1</sup>. MALDI-MSI  
442 was performed on a 15-Tesla Fourier transform ion cyclotron resonance (FTICR)-MS (Bruker  
443 Daltonics, Billerica, MA, USA) equipped with SmartBeam II laser source (355 nm) using 200  
444 shots pixel<sup>-1</sup> with a frequency of 2 kHz and a step size of 200  $\mu$ m. FTICR-MS was operated to  
445 collect m/z 92–700, using a 209-ms transient, which translated to a mass resolution of R ~  
446 70,000 at 400 m/z. Metabolites in this range can typically be detected to fmol concentrations.

#### 447 *Data Analysis*

448 A factorial ANOVA with N treatment, culture type, organism and their interactions as  
449 main effects followed by a Tukey's post hoc test was used to determine treatment differences for  
450 measured variables. Prior to statistical analysis, bulk metabolite values were blank corrected by  
451 subtracting peak intensities identified in background controls of the associated treatment.  
452 Differences in bulk metabolite chemistry were evaluated using distance matrices based on peak  
453 intensities (Bray-Curtis) presence-absence (Jaccard) generated from all detected metabolites  
454 using R *vegan* (31). Differences between culture type, N treatment, and organism were  
455 determined via PERMANOVA using *adonis* in R *vegan*. Spatially resolved metabolite data was  
456 acquired using FlexImaging (v 4.1, Bruker Daltonics), and image processing, segmentation, co-  
457 localization analysis and visualization were performed using SCiLS (Bruker Daltonics). The list  
458 of m/z values that colocalized with the colonies were uploaded to the METLIN

459 (<https://metlin.scripps.edu>) for putative molecular annotations based only on accurate m/z,  
460 secured by using a 3-ppm window during the search. imzML files (created by SCiLS) of our  
461 analyses were also uploaded to METASPACE (32) for metabolite annotation based on both  
462 accurate m/z and a comprehensive bioinformatics framework that considers the relative  
463 intensities and spatial colocalization of isotopic peaks as well as quantifies spatial information  
464 with a measure of spatial chaos followed by the estimation of the False Discovery Rate. For this  
465 purpose, we used KEGG-v1 and NPA-2019-08 (Natural Product Atlas) databases that are  
466 available in METASPACE. METASPACE uses by default 3 ppm window in its annotation  
467 engine.

468

469 **Acknowledgements:** We would like to thank Heather Olson, Carrie Nicora, and Jesse Trejo for  
470 sampling processing work and for taking time to carefully train D.N.S. on the methods. D.N.S. is  
471 also grateful for the support of the Linus Pauling Distinguished Postdoctoral Fellowship program  
472 through Pacific Northwest National Laboratory. Pacific Northwest National Laboratory is a  
473 multiprogram national laboratory operated by Battelle for the U.S. Department of Energy under  
474 contract DE-AC05-76RL01830. This research was performed using resources at the  
475 Environmental Molecular Sciences Laboratory (EMSL; grid.436923.9), a DOE Office of Science  
476 User Facility sponsored by the Biological and Environmental Research program.

477

478

479

480

## 481 **References**

- 482 1. Falkowski PG, Fenchel T, Delong EF. The microbial engines that drive Earth's  
483 biogeochemical cycles. *science*. 2008;320(5879):1034-9.
- 484 2. Hall EK, Bernhardt ES, Bier RL, Bradford MA, Boot CM, Cotner JB, et al.  
485 Understanding how microbiomes influence the systems they inhabit. *Nature microbiology*.  
486 2018;3(9):977-82.
- 487 3. Jansson JK, Hofmockel KS. The soil microbiome—from metagenomics to  
488 metaphenomics. *Current opinion in microbiology*. 2018;43:162-8.
- 489 4. Graham EB, Knelman JE, Schindlbacher A, Siciliano S, Breulmann M, Yannarell A, et  
490 al. Microbes as engines of ecosystem function: when does community structure enhance  
491 predictions of ecosystem processes? *Frontiers in microbiology*. 2016;7:214.
- 492 5. Martiny JB, Jones SE, Lennon JT, Martiny AC. Microbiomes in light of traits: a  
493 phylogenetic perspective. *Science*. 2015;350(6261).
- 494 6. Carini P, Marsden PJ, Leff JW, Morgan EE, Strickland MS, Fierer N. Relic DNA is  
495 abundant in soil and obscures estimates of soil microbial diversity. *Nature microbiology*.  
496 2016;2(3):1-6.
- 497 7. Kleiner M. Metaproteomics: much more than measuring gene expression in microbial  
498 communities. *Msystems*. 2019;4(3):e00115-19.
- 499 8. Prosser JJ. Ecosystem processes and interactions in a morass of diversity. *FEMS*  
500 *Microbiology Ecology*. 2012;81(3):507-19.
- 501 9. Schimel J, Schaeffer SM. Microbial control over carbon cycling in soil. *Frontiers in*  
502 *microbiology*. 2012;3:348.

- 503 10. Jansson JK, Hofmockel KS. Soil microbiomes and climate change. *Nature Reviews*  
504 *Microbiology*. 2020;18(1):35-46.
- 505 11. Baveye PC, Otten W, Kravchenko A. elucidating microbial processes in soils and  
506 sediments: microscale measurements and modeling. *Frontiers in Environmental Science*.  
507 2019;7:78.
- 508 12. Jessup CM, Kassen R, Forde SE, Kerr B, Buckling A, Rainey PB, et al. Big questions,  
509 small worlds: microbial model systems in ecology. *Trends in ecology & evolution*.  
510 2004;19(4):189-97.
- 511 13. Prosser JI, Bohannon BJ, Curtis TP, Ellis RJ, Firestone MK, Freckleton RP, et al. The  
512 role of ecological theory in microbial ecology. *Nature Reviews Microbiology*. 2007;5(5):384-92.
- 513 14. Vandevivere P, Kirchman DL. Attachment stimulates exopolysaccharide synthesis by a  
514 bacterium. *Applied and environmental microbiology*. 1993;59(10):3280-6.
- 515 15. Prigent-Combaret C, Vidal O, Dorel C, Lejeune P. Abiotic surface sensing and biofilm-  
516 dependent regulation of gene expression in *Escherichia coli*. *Journal of bacteriology*.  
517 1999;181(19):5993-6002.
- 518 16. Reed SC, Cleveland CC, Townsend AR. Functional ecology of free-living nitrogen  
519 fixation: a contemporary perspective. *Annual review of ecology, evolution, and systematics*.  
520 2011;42:489-512.
- 521 17. Smercina DN, Evans SE, Friesen ML, Tiemann LK. To fix or not to fix: controls on free-  
522 living nitrogen fixation in the rhizosphere. *Applied and Environmental Microbiology*.  
523 2019;85(6).

- 524 18. Allaway D, Lodwig E, Crompton L, Wood M, Parsons R, Wheeler T, et al. Identification  
525 of alanine dehydrogenase and its role in mixed secretion of ammonium and alanine by pea  
526 bacteroids. *Molecular microbiology*. 2000;36(2):508-15.
- 527 19. Li Y, Parsons R, Day DA, Bergersen FJ. Reassessment of major products of N<sub>2</sub> fixation  
528 by bacteroids from soybean root nodules. *Microbiology*. 2002;148(6):1959-66.
- 529 20. Udvardi M, Poole PS. Transport and metabolism in legume-rhizobia symbioses. *Annual*  
530 *review of plant biology*. 2013;64:781-805.
- 531 21. Waters JK, Mawhinney TP, Emerich DW. Nitrogen assimilation and transport by ex  
532 planta nitrogen-fixing *Bradyrhizobium diazoefficiens* bacteroids is modulated by oxygen,  
533 bacteroid density and L-malate. *International Journal of Molecular Sciences*. 2020;21(20):7542.
- 534 22. Setubal JC, Dos Santos P, Goldman BS, Ertesvåg H, Espin G, Rubio LM, et al. Genome  
535 sequence of *Azotobacter vinelandii*, an obligate aerobe specialized to support diverse anaerobic  
536 metabolic processes. *Journal of bacteriology*. 2009;191(14):4534-45.
- 537 23. Jeong H, Park S-Y, Chung W-H, Kim SH, Kim N, Park S-H, et al. Draft genome  
538 sequence of the *Paenibacillus polymyxa* type strain (ATCC 842T), a plant growth-promoting  
539 bacterium. *Am Soc Microbiol*; 2011.
- 540 24. Baldani JI, Reis VM, Videira SS, Boddey LH, Baldani VLD. The art of isolating  
541 nitrogen-fixing bacteria from non-leguminous plants using N-free semi-solid media: a practical  
542 guide for microbiologists. *Plant and soil*. 2014;384(1):413-31.
- 543 25. Nakayasu ES, Nicora CD, Sims AC, Burnum-Johnson KE, Kim Y-M, Kyle JE, et al.  
544 MPLEx: a robust and universal protocol for single-sample integrative proteomic, metabolomic,  
545 and lipidomic analyses. *MSystems*. 2016;1(3).



- 546 26. Rhine E, Mulvaney R, Pratt E, Sims G. Improving the Berthelot reaction for determining  
547 ammonium in soil extracts and water. *Soil Science Society of America Journal*. 1998;62(2):473-  
548 80.
- 549 27. Kim Y-M, Nowack S, Olsen MT, Becraft ED, Wood JM, Thiel V, et al. Diel  
550 metabolomics analysis of a hot spring chlorophototrophic microbial mat leads to new hypotheses  
551 of community member metabolisms. *Frontiers in microbiology*. 2015;6:209.
- 552 28. Snijders AM, Langley SA, Kim Y-M, Brislawn CJ, Noecker C, Zink EM, et al. Influence  
553 of early life exposure, host genetics and diet on the mouse gut microbiome and metabolome.  
554 *Nature microbiology*. 2016;2(2):1-8.
- 555 29. Kim Y-M, Schmidt BJ, Kidwai AS, Jones MB, Kaiser BLD, Brewer HM, et al.  
556 *Salmonella* modulates metabolism during growth under conditions that induce expression of  
557 virulence genes. *Molecular BioSystems*. 2013;9(6):1522-34.
- 558 30. Nagy G, Veličković D, Chu RK, Carrell AA, Weston DJ, Ibrahim YM, et al. Towards  
559 resolving the spatial metabolome with unambiguous molecular annotations in complex biological  
560 systems by coupling mass spectrometry imaging with structures for lossless ion manipulations.  
561 *Chemical Communications*. 2019;55(3):306-9.
- 562 31. Dixon P. VEGAN, a package of R functions for community ecology. *Journal of*  
563 *Vegetation Science*. 2003;14(6):927-30.
- 564 32. Palmer A, Phapale P, Chernyavsky I, Lavigne R, Fay D, Tarasov A, et al. FDR-  
565 controlled metabolite annotation for high-resolution imaging mass spectrometry. *Nature*  
566 *methods*. 2017;14(1):57-60.
- 567 33. Sprent JI. *The biology of nitrogen-fixing organisms*: McGraw-Hill Book Co.(UK) Ltd.;  
568 1979.

- 569 34. Colnaghi R, Green A, He L, Rudnick P, Kennedy C. Strategies for increased ammonium  
570 production in free-living or plant associated nitrogen fixing bacteria. *Plant and Soil*.  
571 1997;194(1):145-54.
- 572 35. Ortiz-Marquez JCF, Do Nascimento M, Dublan MdlA, Curatti L. Association with an  
573 ammonium-excreting bacterium allows diazotrophic culture of oil-rich eukaryotic microalgae.  
574 *Applied and environmental microbiology*. 2012;78(7):2345-52.
- 575 36. Barney BM, Eberhart LJ, Ohlert JM, Knutson CM, Plunkett MH. Gene deletions  
576 resulting in increased nitrogen release by *Azotobacter vinelandii*: application of a novel nitrogen  
577 biosensor. *Applied and environmental microbiology*. 2015;81(13):4316-28.
- 578 37. Ambrosio R, Ortiz-Marquez JCF, Curatti L. Metabolic engineering of a diazotrophic  
579 bacterium improves ammonium release and biofertilization of plants and microalgae. *Metabolic*  
580 *Engineering*. 2017;40:59-68.
- 581 38. Smith MJ, Francis MB. A designed *A. vinelandii*-*S. elongatus* coculture for chemical  
582 photoproduction from air, water, phosphate, and trace metals. *ACS synthetic biology*.  
583 2016;5(9):955-61.
- 584 39. Ortiz-Marquez JCF, Do Nascimento M, Curatti L. Metabolic engineering of ammonium  
585 release for nitrogen-fixing multispecies microbial cell-factories. *Metabolic Engineering*.  
586 2014;23:154-64.
- 587 40. Wu C, Herold RA, Knoshaug EP, Wang B, Xiong W, Laurens LM. Fluxomic analysis  
588 reveals central carbon metabolism adaptation for diazotroph *azotobacter vinelandii* ammonium  
589 excretion. *Scientific reports*. 2019;9(1):1-11.

- 590 41. Vitousek PM, Cassman K, Cleveland C, Crews T, Field CB, Grimm NB, et al. Towards  
591 an ecological understanding of biological nitrogen fixation. The nitrogen cycle at regional to  
592 global scales: Springer; 2002. p. 1-45.
- 593 42. Kilstrup M, Hammer K, Ruhdal Jensen P, Martinussen J. Nucleotide metabolism and its  
594 control in lactic acid bacteria. FEMS microbiology reviews. 2005;29(3):555-90.
- 595 43. Beaman TC, Hitchins A, Ochi K, Vasantha N, Endo T, Freese E. Specificity and control  
596 of uptake of purines and other compounds in *Bacillus subtilis*. Journal of bacteriology.  
597 1983;156(3):1107-17.
- 598 44. Yao C, Chou J, Wang T, Zhao H, Zhang B. Pantothenic acid, vitamin C, and biotin play  
599 important roles in the growth of *Lactobacillus helveticus*. Frontiers in microbiology.  
600 2018;9:1194.
- 601 45. Peterson W, Peterson MS. Relation of bacteria to vitamins and other growth factors.  
602 Bacteriological reviews. 1945;9(2):49-109.
- 603 46. Palacios OA, Bashan Y, de-Bashan LE. Proven and potential involvement of vitamins in  
604 interactions of plants with plant growth-promoting bacteria—an overview. Biology and fertility  
605 of soils. 2014;50(3):415-32.
- 606 47. Inomura K, Bragg J, Follows MJ. A quantitative analysis of the direct and indirect costs  
607 of nitrogen fixation: a model based on *Azotobacter vinelandii*. The ISME journal.  
608 2017;11(1):166-75.
- 609 48. Dixon R, Kahn D. Genetic regulation of biological nitrogen fixation. Nature Reviews  
610 Microbiology. 2004;2(8):621-31.

- 611 49. Gonzalez-Lopez J, Salmeron V, Moreno J, Ramos-Cormenzana A. Amino acids and  
612 vitamins produced by *Azotobacter vinelandii* ATCC 12837 in chemically-defined media and  
613 dialysed soil media. *Soil Biology and Biochemistry*. 1983;15(6):711-3.
- 614 50. Martinez-Toledo MV, Rodelas B, Salmeron V, Pozo C, Gonzalez-Lopez J. Production of  
615 pantothenic acid and thiamine by *Azotobacter vinelandii* in a chemically defined medium and a  
616 dialysed soil medium. *Biology and fertility of soils*. 1996;22(1):131-5.
- 617 51. Danczak RE, Chu RK, Fansler SJ, Goldman AE, Graham EB, Tfaily MM, et al. Using  
618 metacommunity ecology to understand environmental metabolomes. *Nature communications*.  
619 2020;11(1):1-16.
- 620 52. Danczak RE, Goldman AE, Chu RK, Toyoda JG, Garayburu-Caruso VA, Tolić N, et al.  
621 Ecological theory applied to environmental metabolomes reveals compositional divergence  
622 despite conserved molecular properties. *Science of The Total Environment*. 2021;788:147409.
- 623 53. Wilson RM, Tfaily MM, Kolton M, Johnston ER, Petro C, Zalman CA, et al. Soil  
624 metabolome response to whole-ecosystem warming at the Spruce and Peatland Responses under  
625 Changing Environments experiment. *Proceedings of the National Academy of Sciences*.  
626 2021;118(25).
- 627 54. Song Y, Li X, Yao S, Yang X, Jiang X. Correlations between soil metabolomics and  
628 bacterial community structures in the pepper rhizosphere under plastic greenhouse cultivation.  
629 *Science of The Total Environment*. 2020;728:138439.
- 630 55. Boddy E, Hill PW, Farrar J, Jones DL. Fast turnover of low molecular weight  
631 components of the dissolved organic carbon pool of temperate grassland field soils. *Soil Biology  
632 and Biochemistry*. 2007;39(4):827-35.

- 633 56. Hill PW, Farrar JF, Jones DL. Decoupling of microbial glucose uptake and  
634 mineralization in soil. *Soil Biology and Biochemistry*. 2008;40(3):616-24.
- 635 57. Pétriacq P, Williams A, Cotton A, McFarlane AE, Rolfe SA, Ton J. Metabolite profiling  
636 of non-sterile rhizosphere soil. *The Plant Journal*. 2017;92(1):147-62.
- 637 58. Swenson TL, Jenkins S, Bowen BP, Northen TR. Untargeted soil metabolomics methods  
638 for analysis of extractable organic matter. *Soil Biology and Biochemistry*. 2015;80:189-98.
- 639 59. Dungait JA, Hopkins DW, Gregory AS, Whitmore AP. Soil organic matter turnover is  
640 governed by accessibility not recalcitrance. *Global Change Biology*. 2012;18(6):1781-96.
- 641 60. Wilkinson A, Hill PW, Farrar JF, Jones DL, Bardgett RD. Rapid microbial uptake and  
642 mineralization of amino acids and peptides along a grassland productivity gradient. *Soil Biology  
643 and Biochemistry*. 2014;72:75-83.
- 644 61. Hobbie JE, Hobbie EA. Amino acid cycling in plankton and soil microbes studied with  
645 radioisotopes: measured amino acids in soil do not reflect bioavailability. *Biogeochemistry*.  
646 2012;107(1):339-60.
- 647 62. Drescher K, Nadell CD, Stone HA, Wingreen NS, Bassler BL. Solutions to the public  
648 goods dilemma in bacterial biofilms. *Current Biology*. 2014;24(1):50-5.
- 649 63. Stewart PS. Diffusion in biofilms. *Journal of bacteriology*. 2003;185(5):1485-91.
- 650 64. Flemming H-C, Wingender J. The biofilm matrix. *Nature reviews microbiology*.  
651 2010;8(9):623-33.
- 652 65. Wang D, Xu A, Elmerich C, Ma LZ. Biofilm formation enables free-living nitrogen-  
653 fixing rhizobacteria to fix nitrogen under aerobic conditions. *The ISME journal*.  
654 2017;11(7):1602-13.

655 66. Rinaudi L, Fujishige NA, Hirsch AM, Banchio E, Zorreguieta A, Giordano W. Effects of  
656 nutritional and environmental conditions on *Sinorhizobium meliloti* biofilm formation. *Research*  
657 *in microbiology*. 2006;157(9):867-75.

658 67. Jung J-H, Choi N-Y, Lee S-Y. Biofilm formation and exopolysaccharide (EPS)  
659 production by *Cronobacter sakazakii* depending on environmental conditions. *Food*  
660 *microbiology*. 2013;34(1):70-80.

661

662

663

664

665

666

667

668

669

670

671

672

673

674

675

676

677

678 **Figure legends**

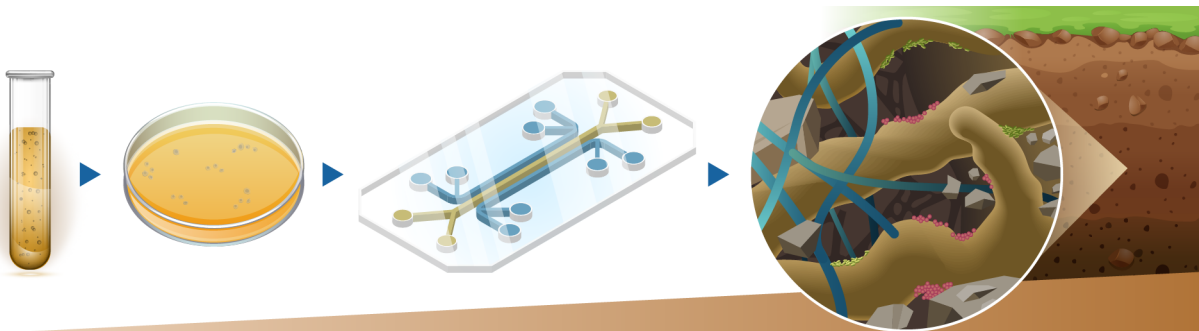

679 ***In vitro*** ——— **Structure and Resource Heterogeneity** ———→ ***In situ***

680 **Fig. 1:** Depiction of the systematic scaling of system complexity from liquid and solid culture to  
 681 synthetic soils (represented here as a microfluidic chip) to *in situ* soil conditions. In our study we  
 682 focus on the first two steps, relating metabolomics in liquid and solid media culture.

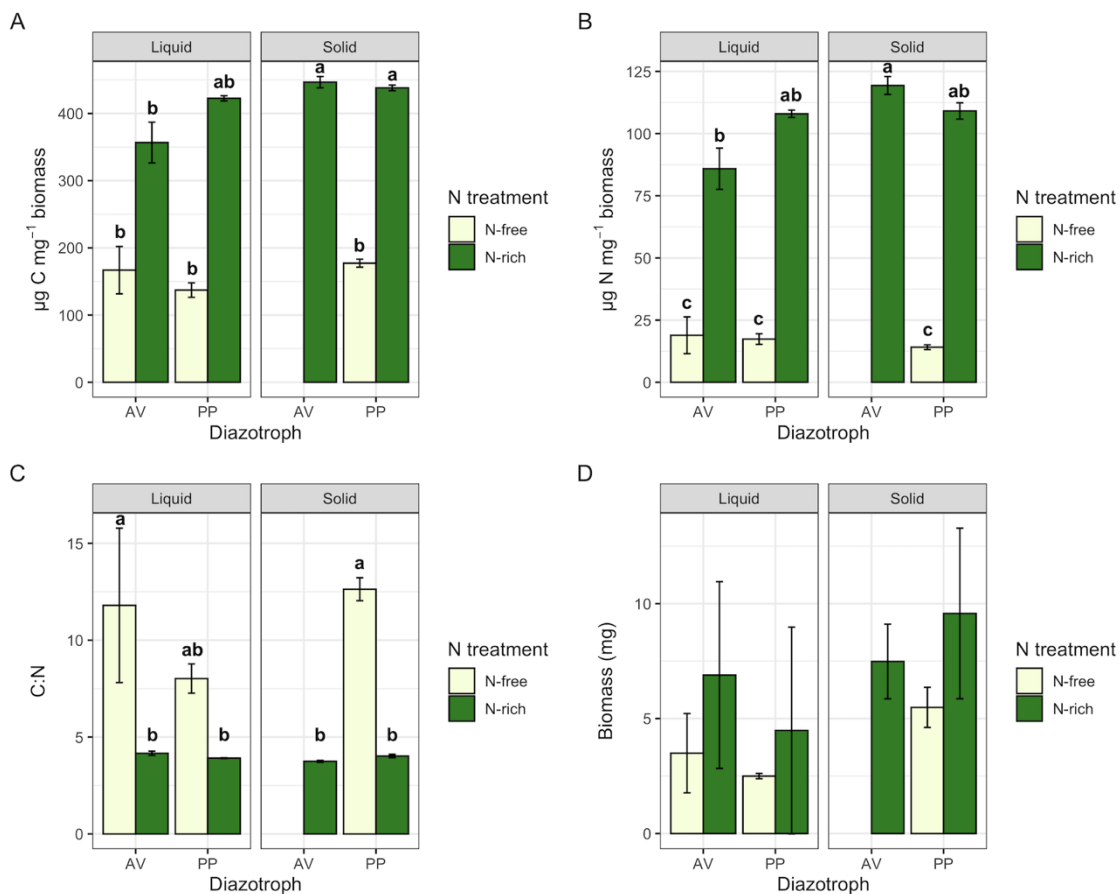

683

684 **Fig. 2:** Microbial (A) C content, (B) N content, (C) C:N ratio, and (D) total biomass. Bars  
685 represent average values  $\pm$  standard error and are colored by nitrogen treatment. Figures are  
686 faceted by culture type. Lowercase letters represent significant difference at  $p < 0.05$ .

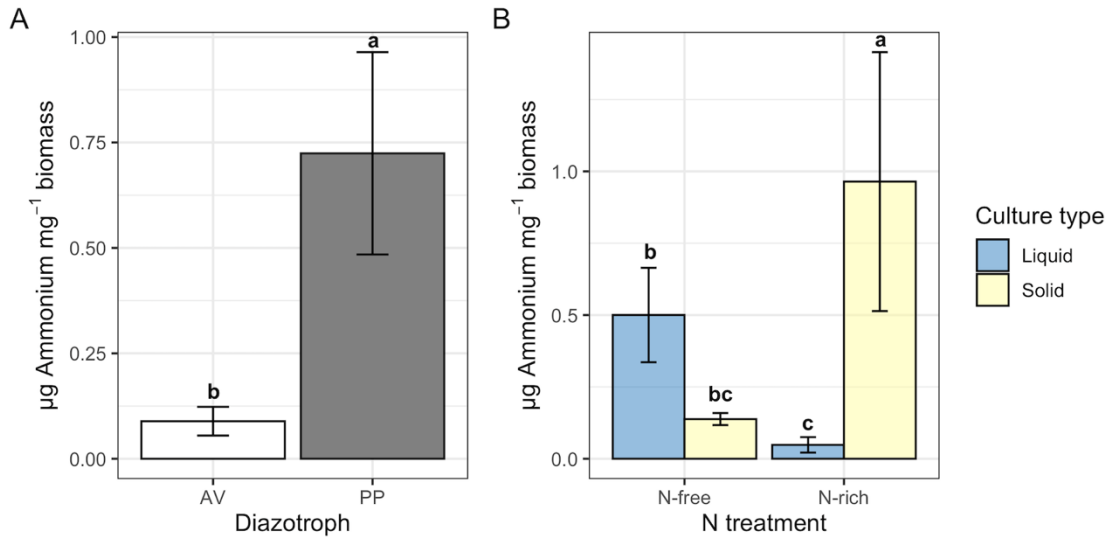

687  
688 **Fig. 3:** Extracellular ammonium availability per unit biomass shown by (A) diazotrophic  
689 organism and by (B) N treatment. Bars represent average values  $\pm$  standard error. Bars in (B) are  
690 colored by culture type. Lowercase letters indicate significant difference at  $p < 0.05$ .



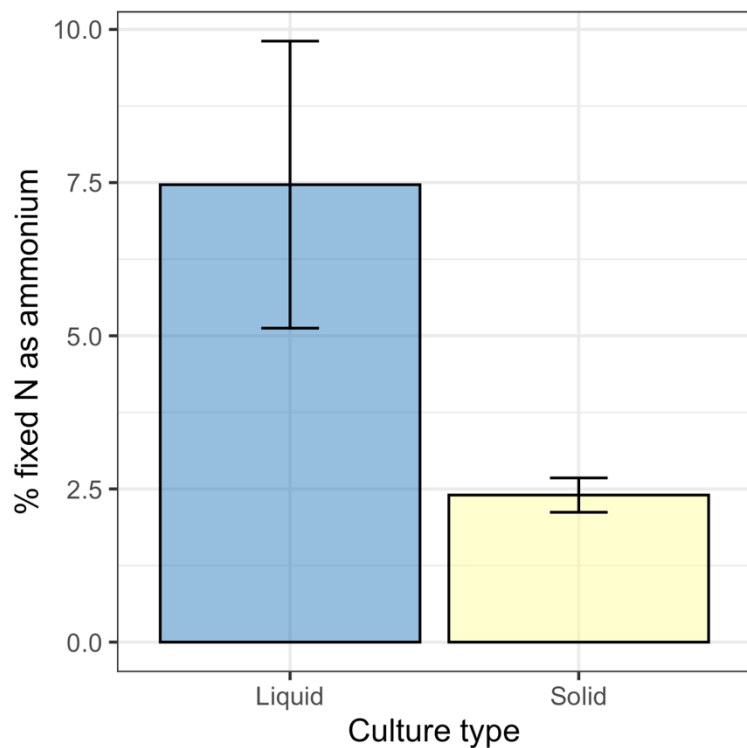

691  
692 **Fig. 4:** Percent of fixed nitrogen available as extracellular ammonium in N-free treatments. Bars  
693 represent average  $\pm$  standard error. No significant difference was observed between culture  
694 types.

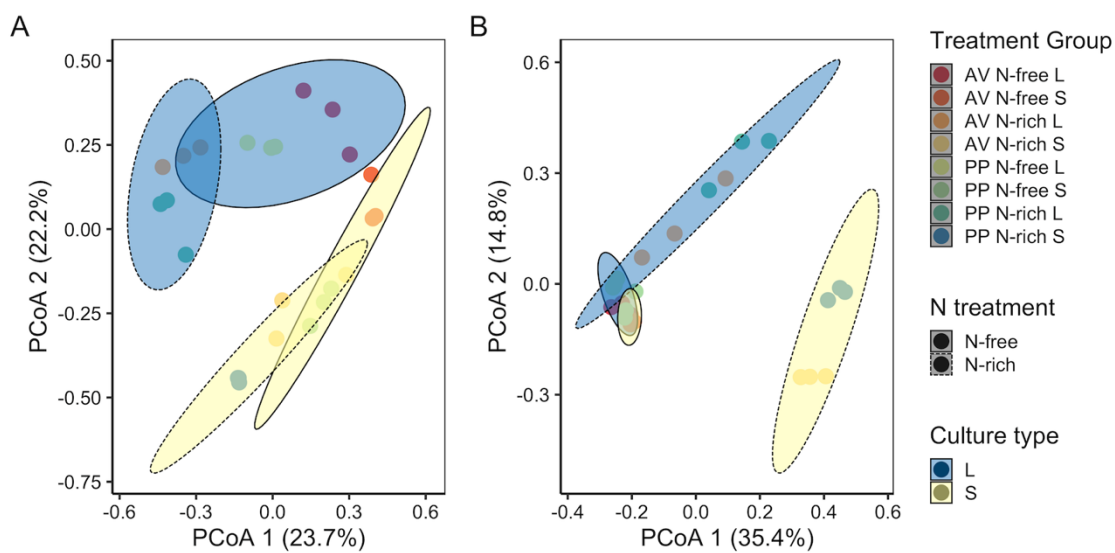

695

696 **Fig. 5:** Principal coordinates analysis (PCoA) of metabolite chemistry based on (A) Bray-Curtis  
697 of peak intensity and (B) Jaccard of presence-absence including all detected metabolites. Each  
698 point represents a single sample and are colored by treatment group (organism, N treatment,  
699 culture type). 95% confidence ellipses are shown for culture type, represented by color, and N  
700 treatment, represented by line type.

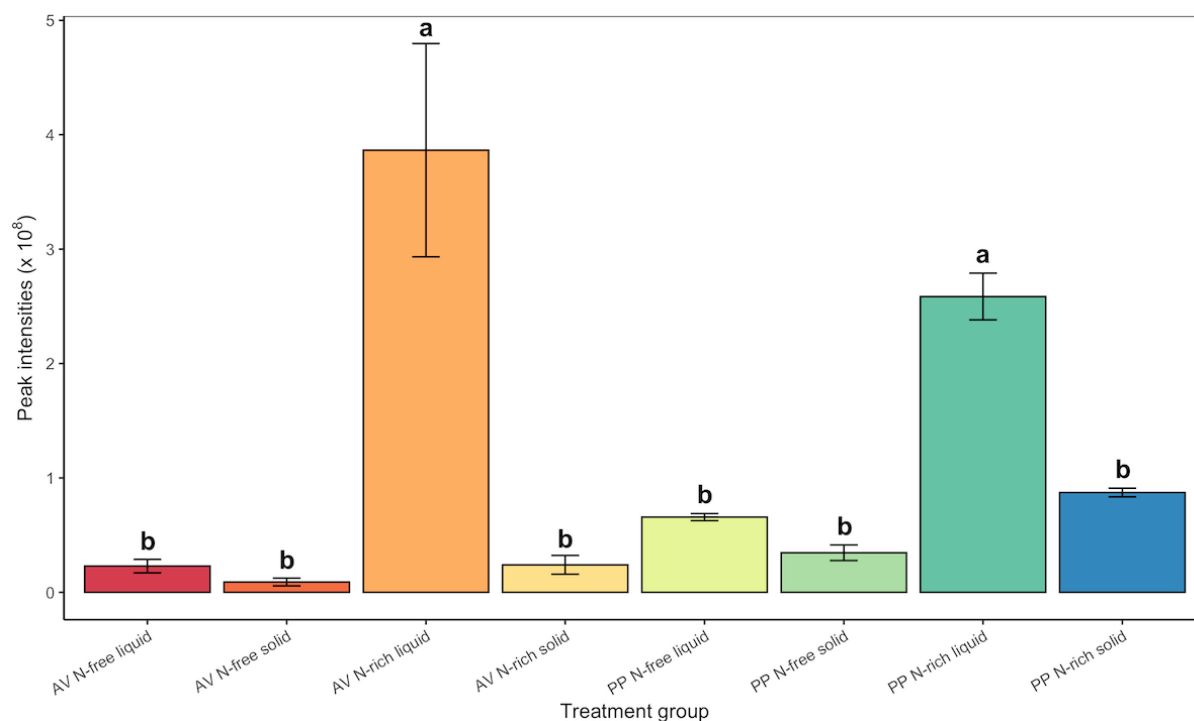

701  
702 **Fig. 6:** Peak intensities of N-containing metabolites detected across treatment groups. Bars  
703 represent average peak intensity  $\pm$  standard error. Lowercase letters indicate significant  
704 difference at  $p < 0.05$ .

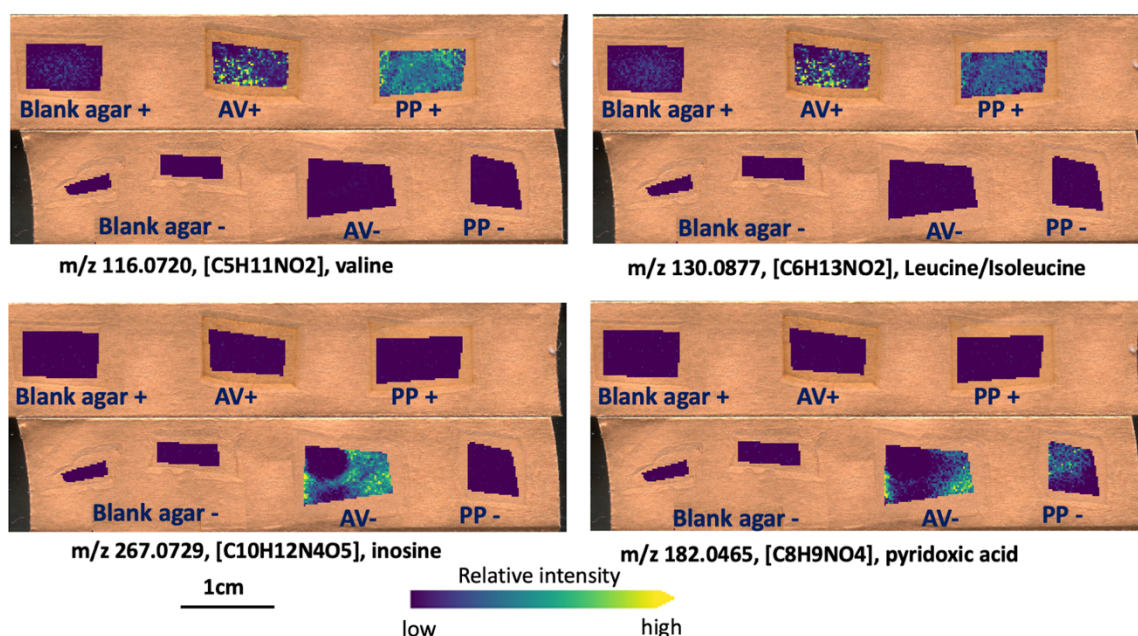

705

706 **Fig. 7:** Examples of the N-containing metabolites detected at the microscale using MALDI MSI.

707 All ions are annotated as  $[M-H]^-$  adducts. Ion images of individual  $m/z$  values were generated on

708 the same color bar scale for visual comparison in terms of relative ion abundance.

709

**Table 1:** PERMANOVA results for Bray-Curtis and Jaccard distance of macroscale metabolite abundance.

|             |              | Df | Sums of Squares | Mean Squares | F model | R squared | p-value |
|-------------|--------------|----|-----------------|--------------|---------|-----------|---------|
| Bray-Curtis | N treatment  | 1  | 1.422           | 1.422        | 7.899   | 0.192     | 0.0001  |
|             | Culture type | 1  | 1.548           | 1.548        | 8.599   | 0.209     | 0.0001  |
|             | Interaction  | 1  | 0.841           | 0.842        | 4.676   | 0.114     | 0.0001  |
|             | Residual     | 20 | 3.601           | 0.180        |         | 0.486     |         |
|             | Total        | 23 | 7.413           |              |         | 1         |         |
| Jaccard     | N treatment  | 1  | 1.350           | 1.350        | 11.547  | 0.279     | 0.0001  |
|             | Culture type | 1  | 0.639           | 0.639        | 5.460   | 0.132     | 0.0003  |
|             | Interaction  | 1  | 0.515           | 0.515        | 4.406   | 0.106     | 0.0016  |
|             | Residual     | 20 | 2.339           | 0.117        |         | 0.483     |         |
|             | Total        | 23 | 4.843           |              |         | 1         |         |

710
